# Supplementary material
Source: MDPI journal article supplement (https://www.mdpi.com/2075-1702/11/9/881)
Supplement: s1 [file s1]

Archive with 1 entries (1 files):
- machines-2575593-supplementary.pdf
