# Supplementary material
Source: MDPI journal article supplement (https://www.mdpi.com/2075-1702/11/9/881)
Supplement: s1 [file s1 › machines-2575593-supplementary.pdf]

## Supplementary Information

# Enhancing Conversion Efficiency of Direct Ink Write Printed Copper (I) Sulfide Thermoelectrics via Sulfur Infusion Process

Raden Gustinvil <sup>1</sup>, William Jordan Wright <sup>1</sup>, Giuseppe L. Di Benedetto <sup>2</sup>, Donald Skelton <sup>2</sup>, Samuel Stuart <sup>3</sup>, John W. Drazin <sup>4</sup> and Emrah Celik <sup>1,\*</sup>

<sup>1</sup> Mechanical and Aerospace Engineering Department, University of Miami, Coral Gables, FL 33146, USA; rxg321@miami.edu (R.G.)

<sup>2</sup> U.S. Army Combat Capabilities Development Command Armaments Center, Picatinny Arsenal, Wharton, NJ 07806, USA

<sup>3</sup> U.S. Navy Naval Surface Warfare Center, Crane Division, Crane, IN 47522, USA

<sup>4</sup> Air Force Research Laboratory, Wright-Patterson Air Force Base, Dayton, OH 45324, USA

\* Correspondence: e.celik@miami.edu; Tel.: +1-305-284-9364

## 1. Stability of DIW $\text{Cu}_{2-x}\text{S}$ samples

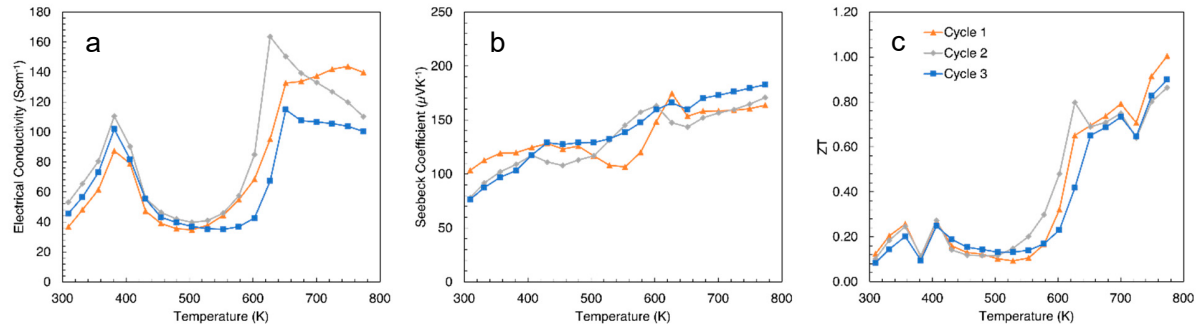

**Figure S1.** Thermoelectric properties of sulfur infused 3D printed  $\text{Cu}_{2-x}\text{S}$  samples: a) electrical conductivity, b) Seebeck coefficient, and c) figure of merit.

## 2. Temperature profile for thermoelectric characterization

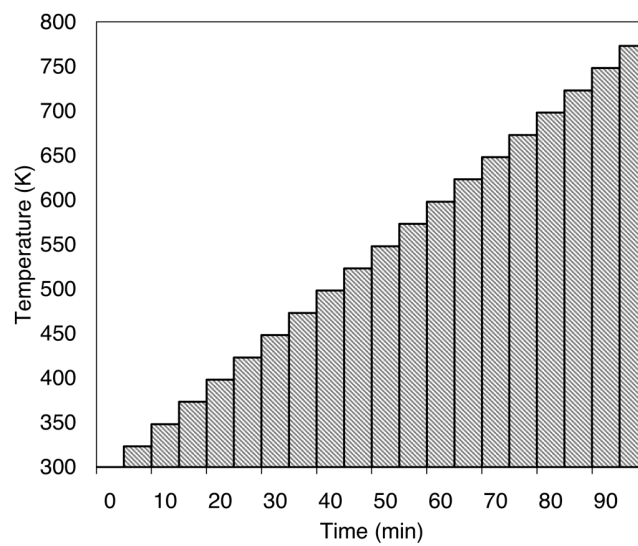

**Figure S2.** Heating profile used for thermoelectric characterization with the Linseis LSR-3 system.

### 3. Thermal data

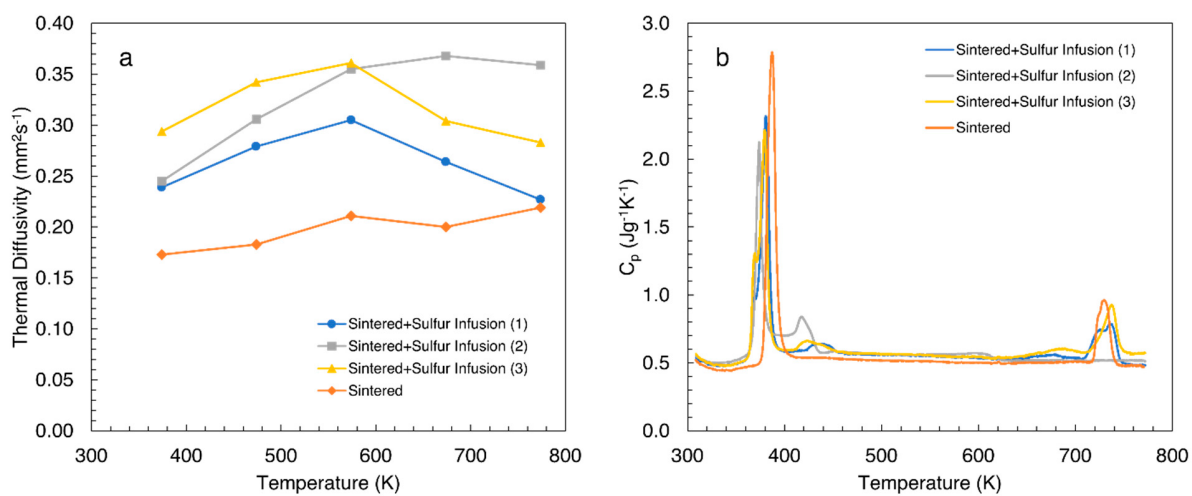

**Figure S3.** Thermal diffusivity a) and specific heat b) of DIW  $\text{Cu}_{2-x}\text{S}$  samples.

#### 4. Pore Analysis

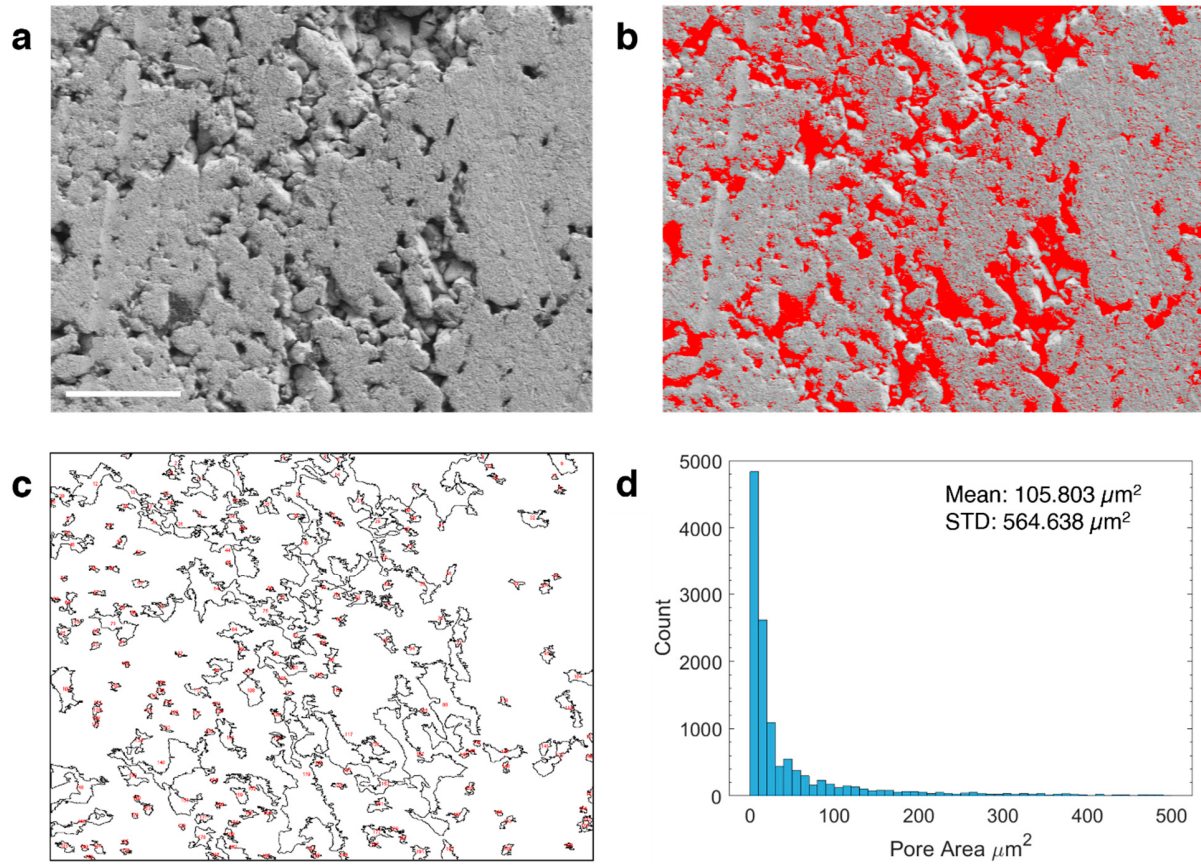

**Figure S4.** Pore analysis was conducted using ImageJ analysis software. a) Raw SEM image of cross-sectional area, b) areas of interest (i.e., pores/voids) are shown highlighted in red according to a user defined threshold to segment the image, c) AOIs are then outlined and numbered, and d) graphical display of the distribution of area pore size in  $\mu\text{m}^2$  calculated from the set of ten (10) images. Scale bars, 100 $\mu\text{m}$ .
